# Supplementary material for: Strong addition effect of charge-bridging polymer in polymer:fullerene solar cells with low fullerene content
Source: Royal Society of Chemistry journal article supplement (doi:10.1039/c4ra01918k), 2014-01-01
Supplement: c4ra01918k1.pdf [file c4ra01918k1.pdf]

[\[Supplementary Information\]](#)

**Strong Addition Effect of Charge-Bridging Polymer in Polymer:Fullerene Solar Cells with Low Fullerene Contents**

**Sungho Nam,<sup>a</sup> Soohyeong Park,<sup>b</sup> Hwajeong Kim,<sup>a,c</sup> Youngkyoo Kim<sup>\*a</sup>**

<sup>a</sup> *Organic Nanoelectronics Laboratory, Department of Chemical Engineering, Kyungpook National University, Daegu 702-701, Republic of Korea*

<sup>b</sup> *Composite Material Development 1 Group, Advanced Composite Materials Technical Centre, Toray Advanced Materials Korea Inc, Gumi 730-410, Republic of Korea.*

<sup>c</sup> *Priority Research Center, Research Institute of Advanced Energy Technology, Kyungpook National University, Daegu 702-701, Republic of Korea*

\*Corresponding Author: [ykimm@knu.ac.kr](mailto:ykimm@knu.ac.kr)

This ESI contains summary of solar cell performance, d-spacings for pristine and BHJ films, photoelectron (PE) yield spectra of P3HT and PBDTTPD films, semi-logarithmic J-V curves of devices, dark J-V curves of devices, light J-V curves of two binary BHJ devices, thickness-normalized PL spectra of P3HT and PBDTTPD films, and enlarged TEM images.

**Table S1.** Summary of solar cell performances according to the PBDTTPD content. All data were taken from the light J-V curves in Figure 1.

| PBDTTPD (wt.%)                         | 0     | 1     | 5     | 10    | 20    | 40    | 60    |
|----------------------------------------|-------|-------|-------|-------|-------|-------|-------|
| $J_{SC}$ (mA/cm <sup>2</sup> )         | 1.655 | 1.142 | 1.210 | 3.638 | 7.551 | 5.985 | 4.074 |
| $V_{OC}$ (V)                           | 0.40  | 0.34  | 0.35  | 0.49  | 0.66  | 0.65  | 0.64  |
| FF (%)                                 | 48.7  | 48.5  | 48.2  | 43.2  | 47.3  | 45.7  | 40.1  |
| PCE (%)                                | 0.322 | 0.188 | 0.204 | 0.770 | 2.358 | 1.779 | 1.045 |
| $R_S$ (k $\Omega$ cm <sup>2</sup> )    | 0.59  | 0.77  | 0.71  | 0.32  | 0.21  | 0.30  | 0.58  |
| $R_{SH}$ (k $\Omega$ cm <sup>2</sup> ) | 8.0   | 13.2  | 12.1  | 3.7   | 3.4   | 3.2   | 3.9   |

**Table S2.** d-spacing values for the pristine (P3HT and PBDTTPD) and bulk heterojunction (BHJ) films with different PBDTTPD contents. All data are taken from the GIXD profiles from Figure 7.

| Films                              | Constituent | Direction | d-spacing (Å) |
|------------------------------------|-------------|-----------|---------------|
| Pristine                           | P3HT        | OOP, IP   | 16.42         |
| Pristine                           | PBDTTPD     | OOP, IP   | 18.75         |
| BHJ<br>PBDTTPD (wt.%)<br>= 0 wt.%  | P3HT        | OOP       | 16.74         |
|                                    | PBDTTPD     | IP        | 16.57         |
| BHJ<br>PBDTTPD (wt.%)<br>= 20 wt.% | P3HT        | OOP       | N/M           |
|                                    | PBDTTPD     | OOP       | 18.53         |
|                                    | P3HT        | IP        | 16.49         |
|                                    | PBDTTPD     | IP        | 18.35         |
| BHJ<br>PBDTTPD (wt.%)<br>= 40 wt.% | P3HT        | OOP       | N/M           |
|                                    | PBDTTPD     | OOP       | 18.70         |
|                                    | P3HT        | IP        | 16.74         |
|                                    | PBDTTPD     | IP        | 18.70         |

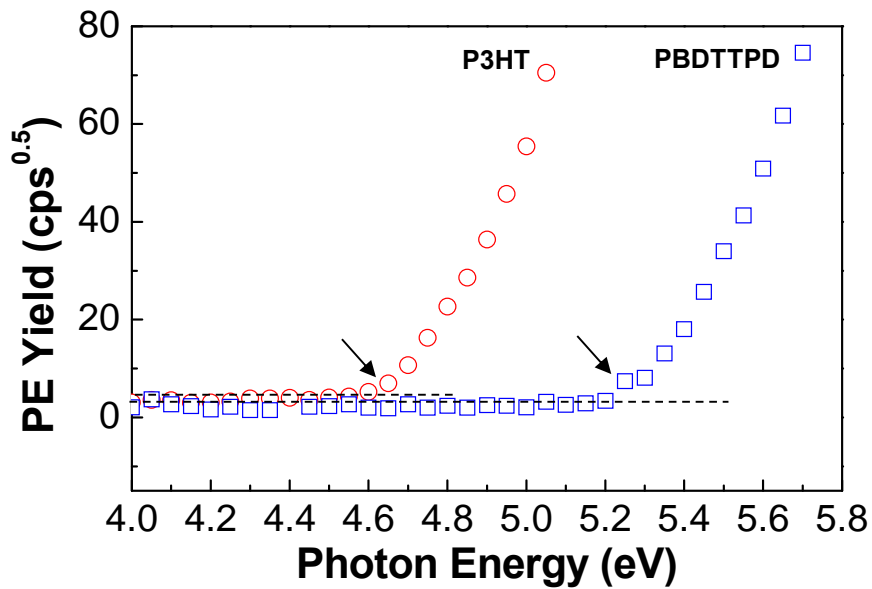

**Fig. S1.** Photoelectron (PE) yield spectra of the pristine polymer films (P3HT and PBDTTPD) coated on the ITO-glass substrates. Arrows denote the onset points for each film.

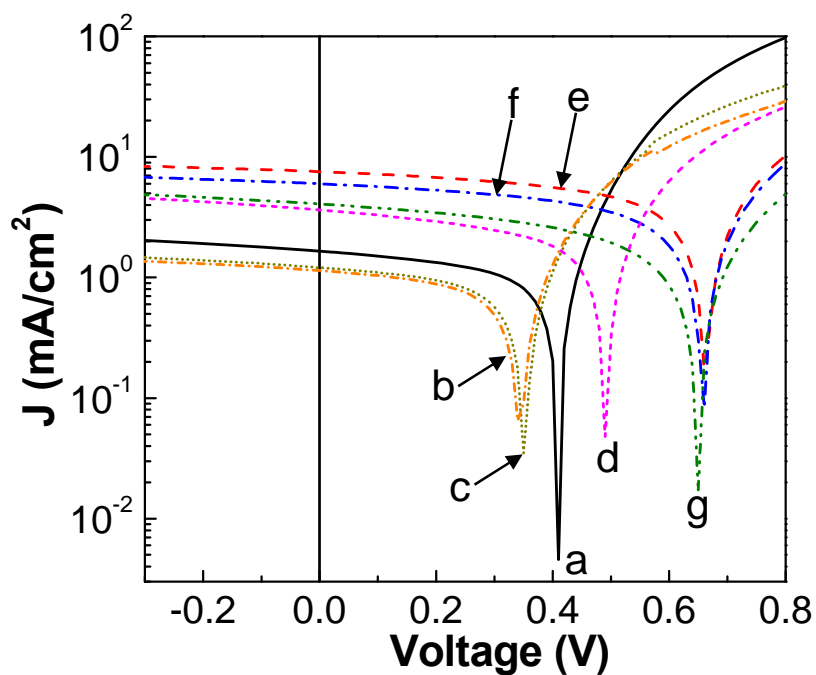

**Fig. S2.** Semi-logarithmic light ( $100 \text{ mW/cm}^2$ ) J-V curves of devices according to the PBDTTPD content: (a) 0, (b) 1, (c) 5, (d) 10, (e) 20, (f) 40 wt.%.

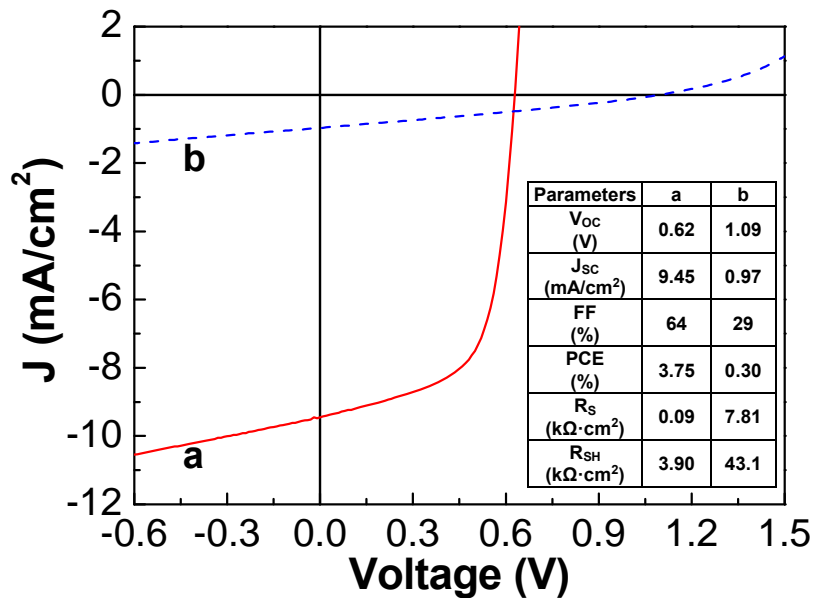

**Fig. S3.** Light J-V curves for two binary BHJ devices with the glass/ITO/PEDOT:PSS/ active layer/LiF/Al structure. The active layer was (a) P3HT:PC<sub>61</sub>BM (1:1 by weight) and (b) P3HT:PBDTTPD (1:0.7 by weight).

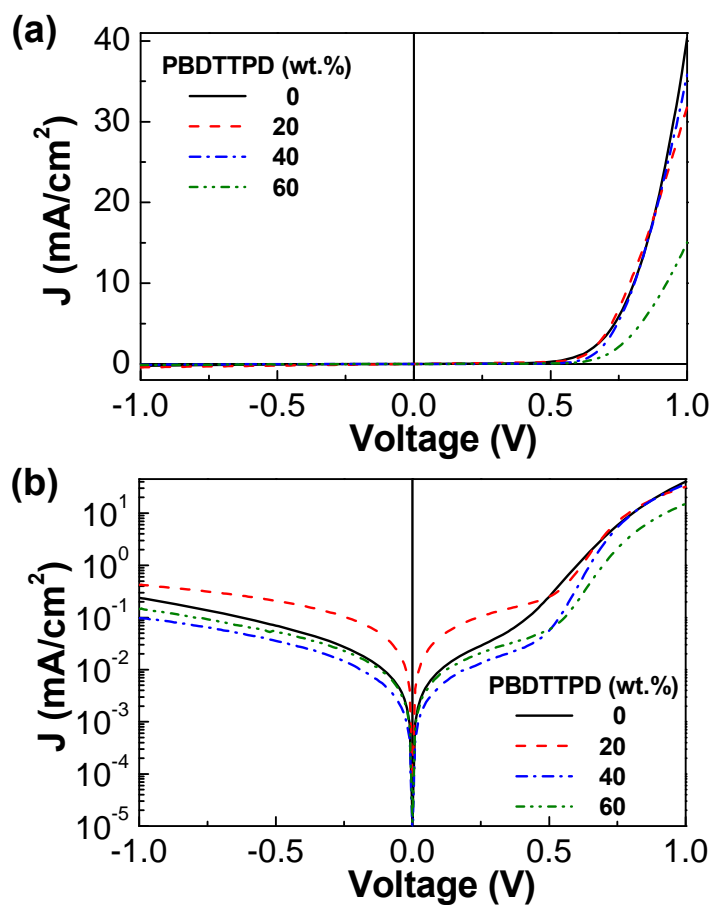

**Fig. S4.** Dark J-V curves of devices according to the PBDTTPD content: (a) linear plot, (b) semi-logarithmic plot.

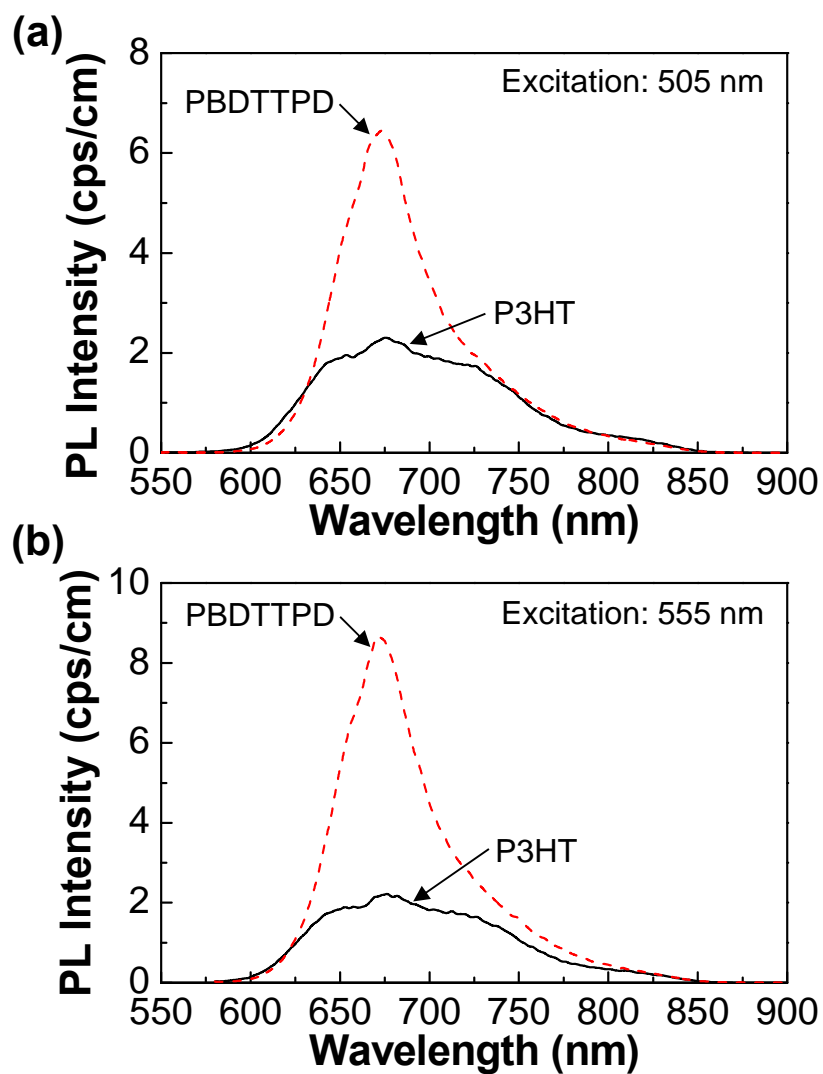

**Fig. S5.** Thickness-normalized PL spectra of the pristine films (P3HT and PBDTTPD). The excitation wavelength was (a) 505 nm and (b) 555 nm.

(a) PBDTTPD = 0 wt.%

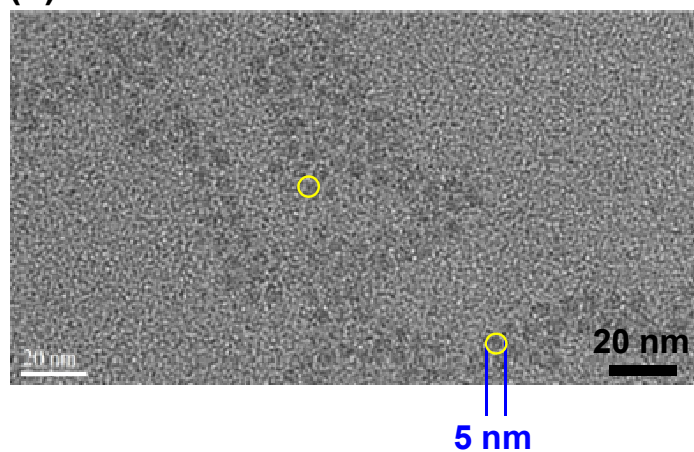

(b) PBDTTPD = 20 wt.%

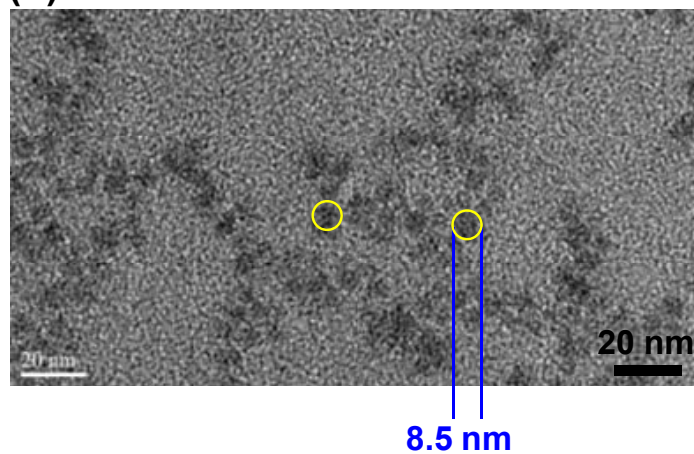

(c) PBDTTPD = 40 wt.%

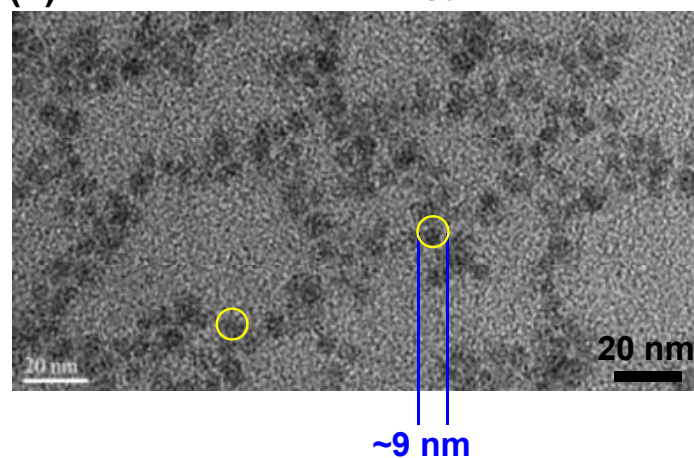

**Fig. S6.** Enlarged TEM images of the bulk heterojunction films according to the PBDTTPPD content. The approximate size of PC<sub>61</sub>BM aggregates is displayed in each image.
